# Supplementary material for: miR-4780 Derived from N2-Like Neutrophil Exosome Aggravates Epithelial-Mesenchymal Transition and Angiogenesis in Colorectal Cancer
Source: Hindawi journal article supplement (doi:10.1155/2023/2759679), 2023-08-04
Supplement: f1 [file 2759679.f1.docx]

**Supplement table 1 Clinical characteristics of patients (n = 30)**

| **Parameter** | n (%) |
| --- | --- |
|
|
| **Gender** |  |
| Male | 16(53.33%) |
| Female | 14(46.67%) |
| **Age, years** |  |
| <60 | 10(33.33%) |
| ≧60 | 20(66.67%) |
| **Tumor site** |  |
| Ileocecum | 4(13.33%) |
| Left colon | 16(53.33%) |
| Right colon | 10(33.33%) |
| **Tumor diameter** |  |
| <5cm | 11(36.67%) |
| ≧5cm | 19（63.33%） |
| **Tumor grade** |  |
| Poor | 13（43.33%） |
| Moderated/Well | 17（56.67%） |
| **TNM stage a** |  |
| I & II | 21（70.00%） |
| III & IV | 9（30.00%） |
| **LNM** |  |
| Presence | 7（23.33%） |
| Absence | 23（76.67%） |
| **Invasion of serosa** |  |
| Presence | 18（60.00%） |
| Absence | 12（40.00%） |
| **Total** | 30（100%） |

**supplement table 2 differential expressed miRNAs**

up_Group2_vs_Group1

| # Fold Change cut-off: **1.0** # P-value cut-off: **1.0** # Condition pairs: **Group2_vs_Group1** # Column A: systematic_name it represents miRNA name.# Column B: P-value, P-value calculated from unpaired t-test.# Column C: FDR, FDR is calculated from Benjamini Hochberg FDR.# Column D: Fold change, the absolute ratio (no log scale) of normalized intensities between two conditions.# Column E: Regulation, it depicts which group has greater or lower intensity values wrt other group.# Column F ~ K: Annotations, include mirbase accession No, chr, strand, start, stop and active_sequence.# Column L, M: Raw Intensity of each group (averaged raw intensities of replicate samples).# Column N, O: Normalized Intensity of each group (averaged normalized intensities of replicate samples, log2 transformed).# Column P ~ U: Raw Intensity of each sample.# Column V ~ AA: Normalized Intensity of each sample (log2 transformed). | | | | | | | | | | | | | | | | | | | | | | | | | | |
| --- | --- | --- | --- | --- | --- | --- | --- | --- | --- | --- | --- | --- | --- | --- | --- | --- | --- | --- | --- | --- | --- | --- | --- | --- | --- | --- |
|  |
|  |
|  |
|  |
|  |
|  |
|  |
|  |
|  |
|  |
|  |
|  |
|  |
|  |  |  |  |  |  |  |  |  |  |  |  |  |  |  |  |  |  |  |  |  |  |  |  |  |  |  |  |
| **Group2_vs_Group1 1.0 fold up regulated miRNAs** | | | | | | | | | | | | | | | | | | | | | | | | | | |  |
|  | **P-value and FDR** | | **Fold change and Regulation** | | **Annotations** | | | | | | **Group--Raw Intensity** | | **Group--Normalized Intensity** | | **Raw Intensity** | | | | | | **Normalized Intensity** | | | | | |  |
| **systematic_name** | **P-value** | **FDR** | **Fold Change** | **Regulation** | **mirbase accession No** | **chr** | **strand** | **start** | **stop** | **active_sequence** | **group-Group2(raw)** | **group-Group1(raw)** | **group-Group2(normalized)** | **group-Group1(normalized)** | **[2-1, Group2](raw)** | **[2-2, Group2](raw)** | **[2-3, Group2](raw)** | **[1-1, Group1](raw)** | **[1-2, Group1](raw)** | **[1-3, Group1](raw)** | **[2-1, Group2](normalized)** | **[2-2, Group2](normalized)** | **[2-3, Group2](normalized)** | **[1-1, Group1](normalized)** | **[1-2, Group1](normalized)** | **[1-3, Group1](normalized)** |  |
| hsa-miR-4780 | 3.25497E-05 | 0.027830025 | 36.0390389 | up | MIMAT0019939 |  |  |  |  | GCTAGGGATCAGGCT | 5 | 0.1 | 1.938045 | -3.233443 | 5 | 5 | 5 | 0.1 | 0.1 | 0.1 | 1.4760311 | 2.326005 | 2.0120997 | -3.1756856 | -3.2290485 | -3.295596 |  |
| hsa-miR-513b-3p | 0.002560211 | 0.974439062 | 1.5930238 | up | MIMAT0026749 |  |  |  |  | TCCTCTCAAAAAGGTGAC | 60.875735 | 37.753801 | 5.900811 | 5.229043 | 70.9225 | 54.709602 | 56.995102 | 48.809097 | 32.053402 | 32.398903 | 5.9409685 | 5.8558335 | 5.90563 | 5.421961 | 5.1492915 | 5.115876 |  |

down_Group2_vs_Group1

| # Fold Change cut-off: **1.0** # P-value cut-off: **1.0** # Condition pairs: **Group2_vs_Group1** # Column A: systematic_name it represents miRNA name.# Column B: P-value, P-value calculated from unpaired t-test.# Column C: FDR, FDR is calculated from Benjamini Hochberg FDR.# Column D: Fold change, the absolute ratio (no log scale) of normalized intensities between two conditions.# Column E: Regulation, it depicts which group has greater or lower intensity values wrt other group.# Column F ~ K: Annotations, include mirbase accession No, chr, strand, start, stop and active_sequence.# Column L, M: Raw Intensity of each group (averaged raw intensities of replicate samples).# Column N, O: Normalized Intensity of each group (averaged normalized intensities of replicate samples, log2 transformed).# Column P ~ U: Raw Intensity of each sample.# Column V ~ AA: Normalized Intensity of each sample (log2 transformed). | | | | | | | | | | | | | | | | | | | | | | | | | | |
| --- | --- | --- | --- | --- | --- | --- | --- | --- | --- | --- | --- | --- | --- | --- | --- | --- | --- | --- | --- | --- | --- | --- | --- | --- | --- | --- |
|  |
|  |
|  |
|  |
|  |
|  |
|  |
|  |
|  |
|  |
|  |
|  |
|  |
|  |  |  |  |  |  |  |  |  |  |  |  |  |  |  |  |  |  |  |  |  |  |  |  |  |  |  |  |
| **Group2_vs_Group1 1.0 fold down regulated miRNAs** | | | | | | | | | | | | | | | | | | | | | | | | | | |  |
|  | **P-value and FDR** | | **Fold change and Regulation** | | **Annotations** | | | | | | **Group--Raw Intensity** | | **Group--Normalized Intensity** | | **Raw Intensity** | | | | | | **Normalized Intensity** | | | | | |  |
| **systematic_name** | **P-value** | **FDR** | **Fold Change** | **Regulation** | **mirbase accession No** | **chr** | **strand** | **start** | **stop** | **active_sequence** | **group-Group2(raw)** | **group-Group1(raw)** | **group-Group2(normalized)** | **group-Group1(normalized)** | **[2-1, Group2](raw)** | **[2-2, Group2](raw)** | **[2-3, Group2](raw)** | **[1-1, Group1](raw)** | **[1-2, Group1](raw)** | **[1-3, Group1](raw)** | **[2-1, Group2](normalized)** | **[2-2, Group2](normalized)** | **[2-3, Group2](normalized)** | **[1-1, Group1](normalized)** | **[1-2, Group1](normalized)** | **[1-3, Group1](normalized)** |  |
| hsa-miR-1307-3p | 0.04302276 | 0.974439062 | 1.5224379 | down | MIMAT0005951 | chr10 | + | 105154110 | 105154099 | CACGACCGACGCC | 7.159733 | 10.939006 | 2.822393 | 3.428776 | 8.17472 | 6.4588 | 6.84568 | 12.4789095 | 12.2719 | 8.06621 | 2.9358118 | 2.6948342 | 2.836532 | 3.5087585 | 3.7196274 | 3.0579422 |  |
| hsa-miR-3938 | 2.06467E-06 | 0.00353059 | 39.7237945 | down | MIMAT0018353 |  |  |  |  | CCGGGTTATCTACAAGG | 0.1 | 5 | -3.219881 | 2.092051 | 0.1 | 0.1 | 0.1 | 5 | 5 | 5 | -3.3219368 | -3.061387 | -3.2763183 | 2.2213027 | 2.1610804 | 1.8937694 |  |
