# Supplementary material for: miR-4780 Derived from N2-Like Neutrophil Exosome Aggravates Epithelial-Mesenchymal Transition and Angiogenesis in Colorectal Cancer
Source: Hindawi journal article supplement (doi:10.1155/2023/2759679), 2023-08-04
Supplement: f2 [file 2759679.f2.docx]

**
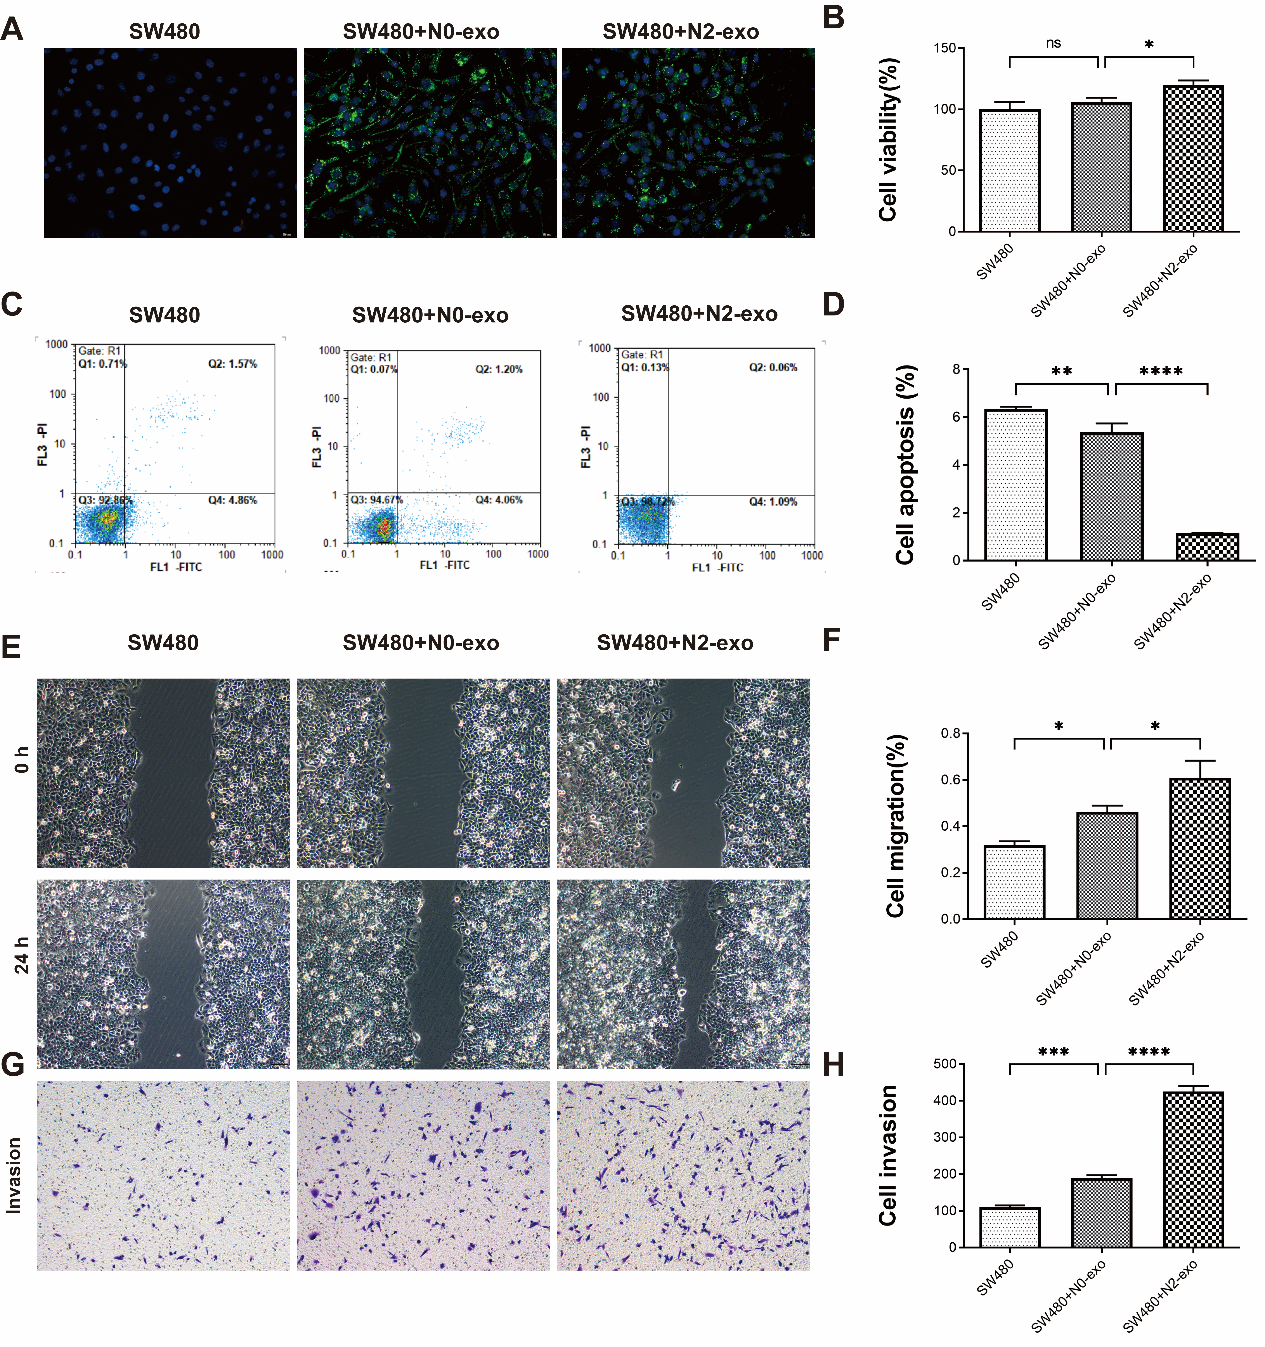
**

**Supplement figure 1:** **Exosomes derived from N2-like neutrophils promotes the tumor progression of** **SW480.** (A) Exosomes was labeled by PKH-67(Green) and the internalization of exosomes by SW480was observed (*40). (B) CCK8 assay for cellular viability. (C-D) Cell apoptosis was detected by flow cytometer. (E-F) Wound healing assay for cell migration (*10) (G-H) Transwell assay for cell invasion (*10). Error bars represent SD. *, *p* < 0.05; **, *p* < 0.01; ***, *p* < 0.001; ****, *p* < 0.0001.

**
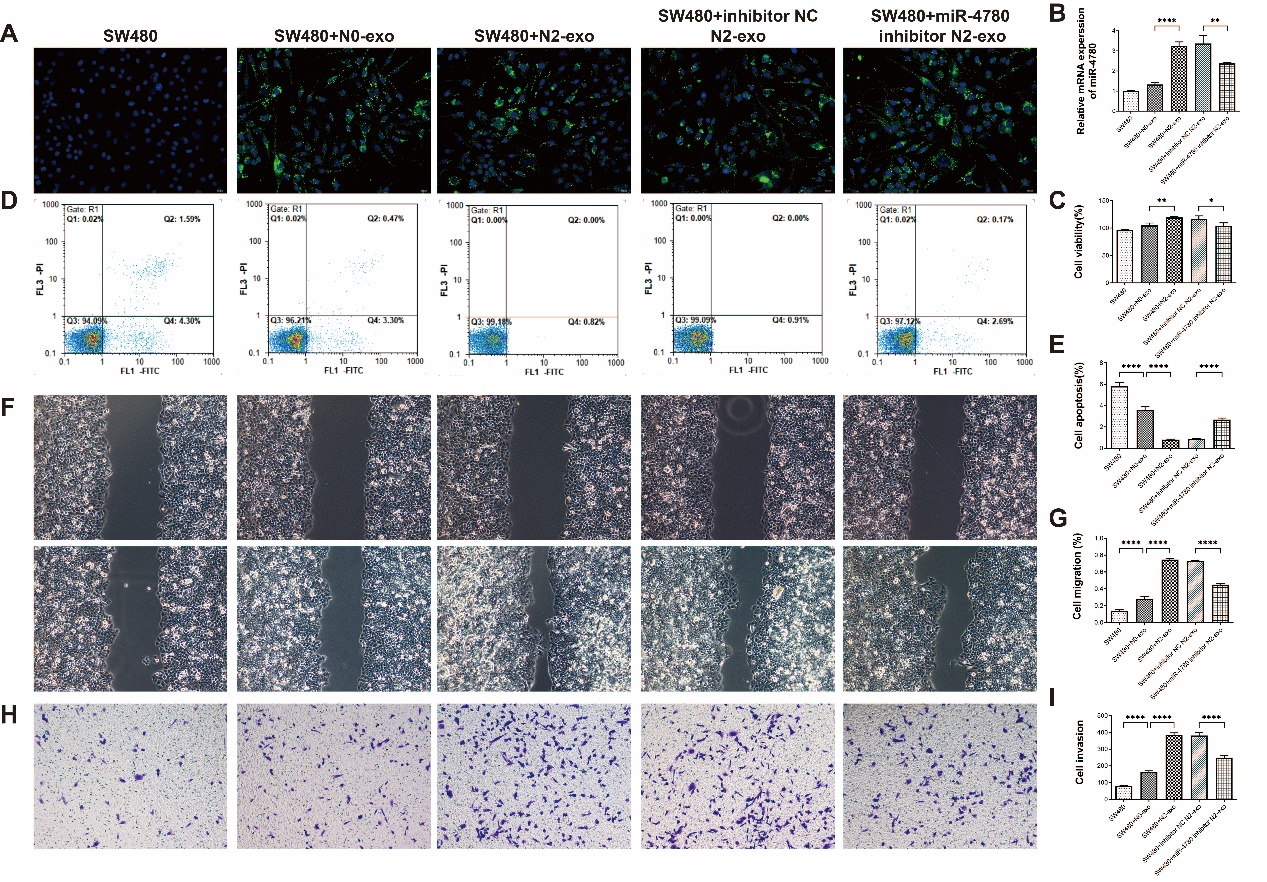
**

**Supplement figure 2: miR-4780 promotes the tumor progression of SW480.** (A) Exosomes was labeled by PKH-67(Green) and the internalization of exosomes by SW480was observed. (B) Expression of miR-4780 in exosomes was measured via qPCR. (C) CCK8 assay for cellular viability (D-E) Cell apoptosis was detected by flow cytometer. (F-G) Wound healing assay for cell migration (*10) (H-I) Transwell assay for cell invasion (*10). Error bars represent SD. *, *p* < 0.05; **, *p* < 0.01; ****, *p* < 0.0001.

**
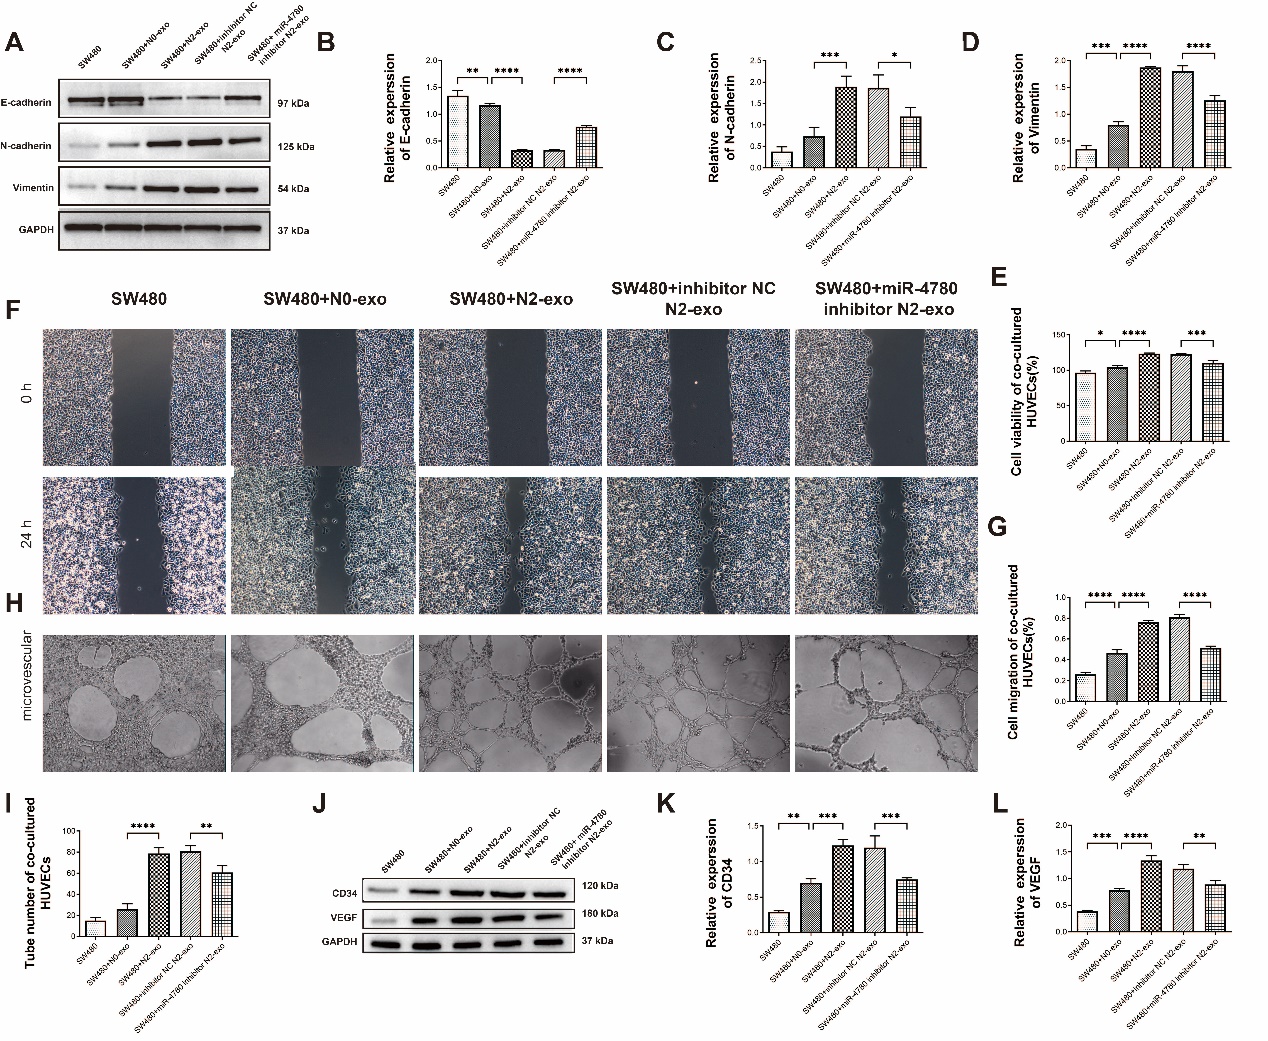
**

**Supplement figure 3: miR-4780 promotes the EMT and angiogenesis of SW480**. (A-D) The expression of EMT associated proteins, E-cadherin, N- cadherin and Vimentin in SW480were measured via western blot. (E) CCK8 assay for cellular viability of HUVECs. (F-G) Wound healing assay for cell migration of HUVECs. (*10) (H-I) Tube formation assay was conducted and tube number was calculated. (*40) (J-L) The expression of angiogenesis associated proteins, CD34 and VEGF in HUVECs were measured via western blot. Error bars represent SD. *, *p* < 0.05; **, *p* < 0.01; ***, *p* < 0.001; ****, *p* < 0.0001.


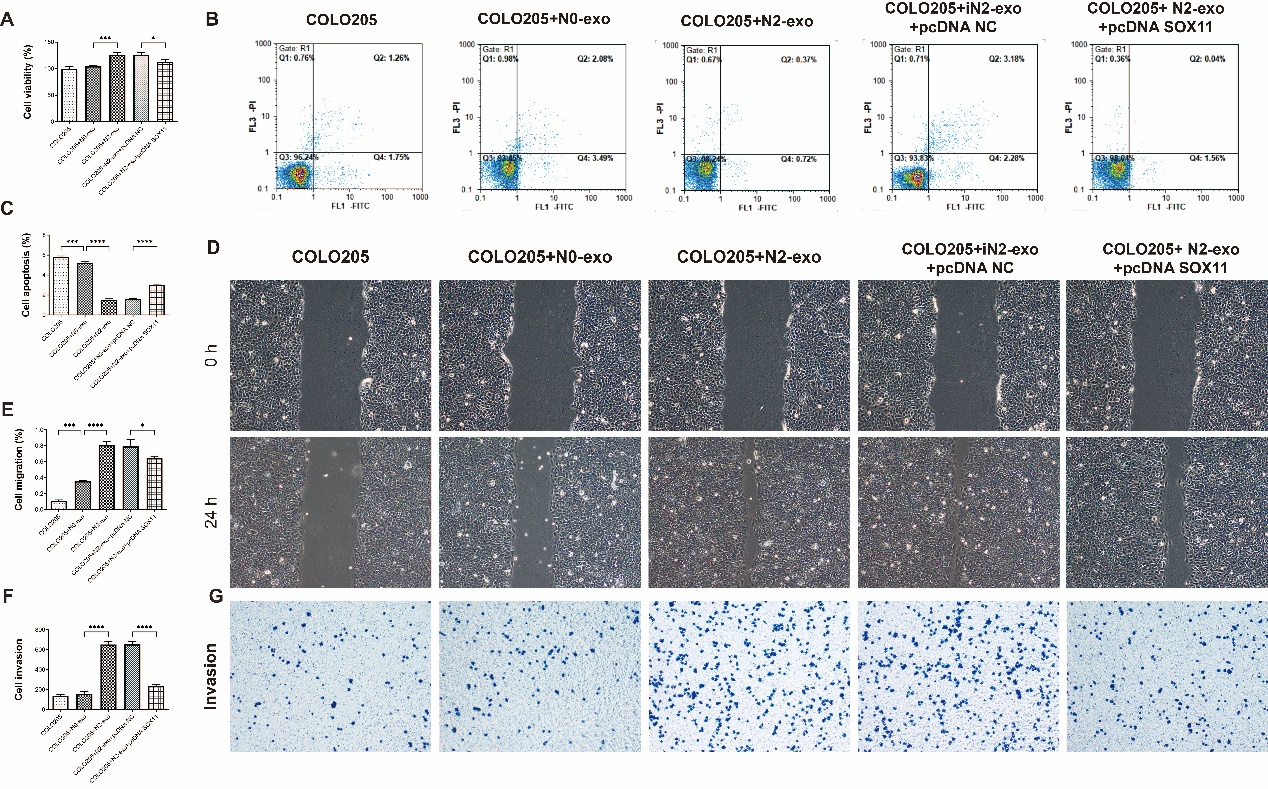


**Supplement figure 4: SOX11 promotes the tumor progression of COLO205.** (A) CCK8 assay for cellular viability (B-C) Cell apoptosis was detected by flow cytometer. (D-E) Wound healing assay for cell migration (*10) (F-G) Transwell assay for cell invasion (*10). Error bars represent SD. *, *p* < 0.05; **, *p* < 0.01; ****, *p* < 0.0001.

**
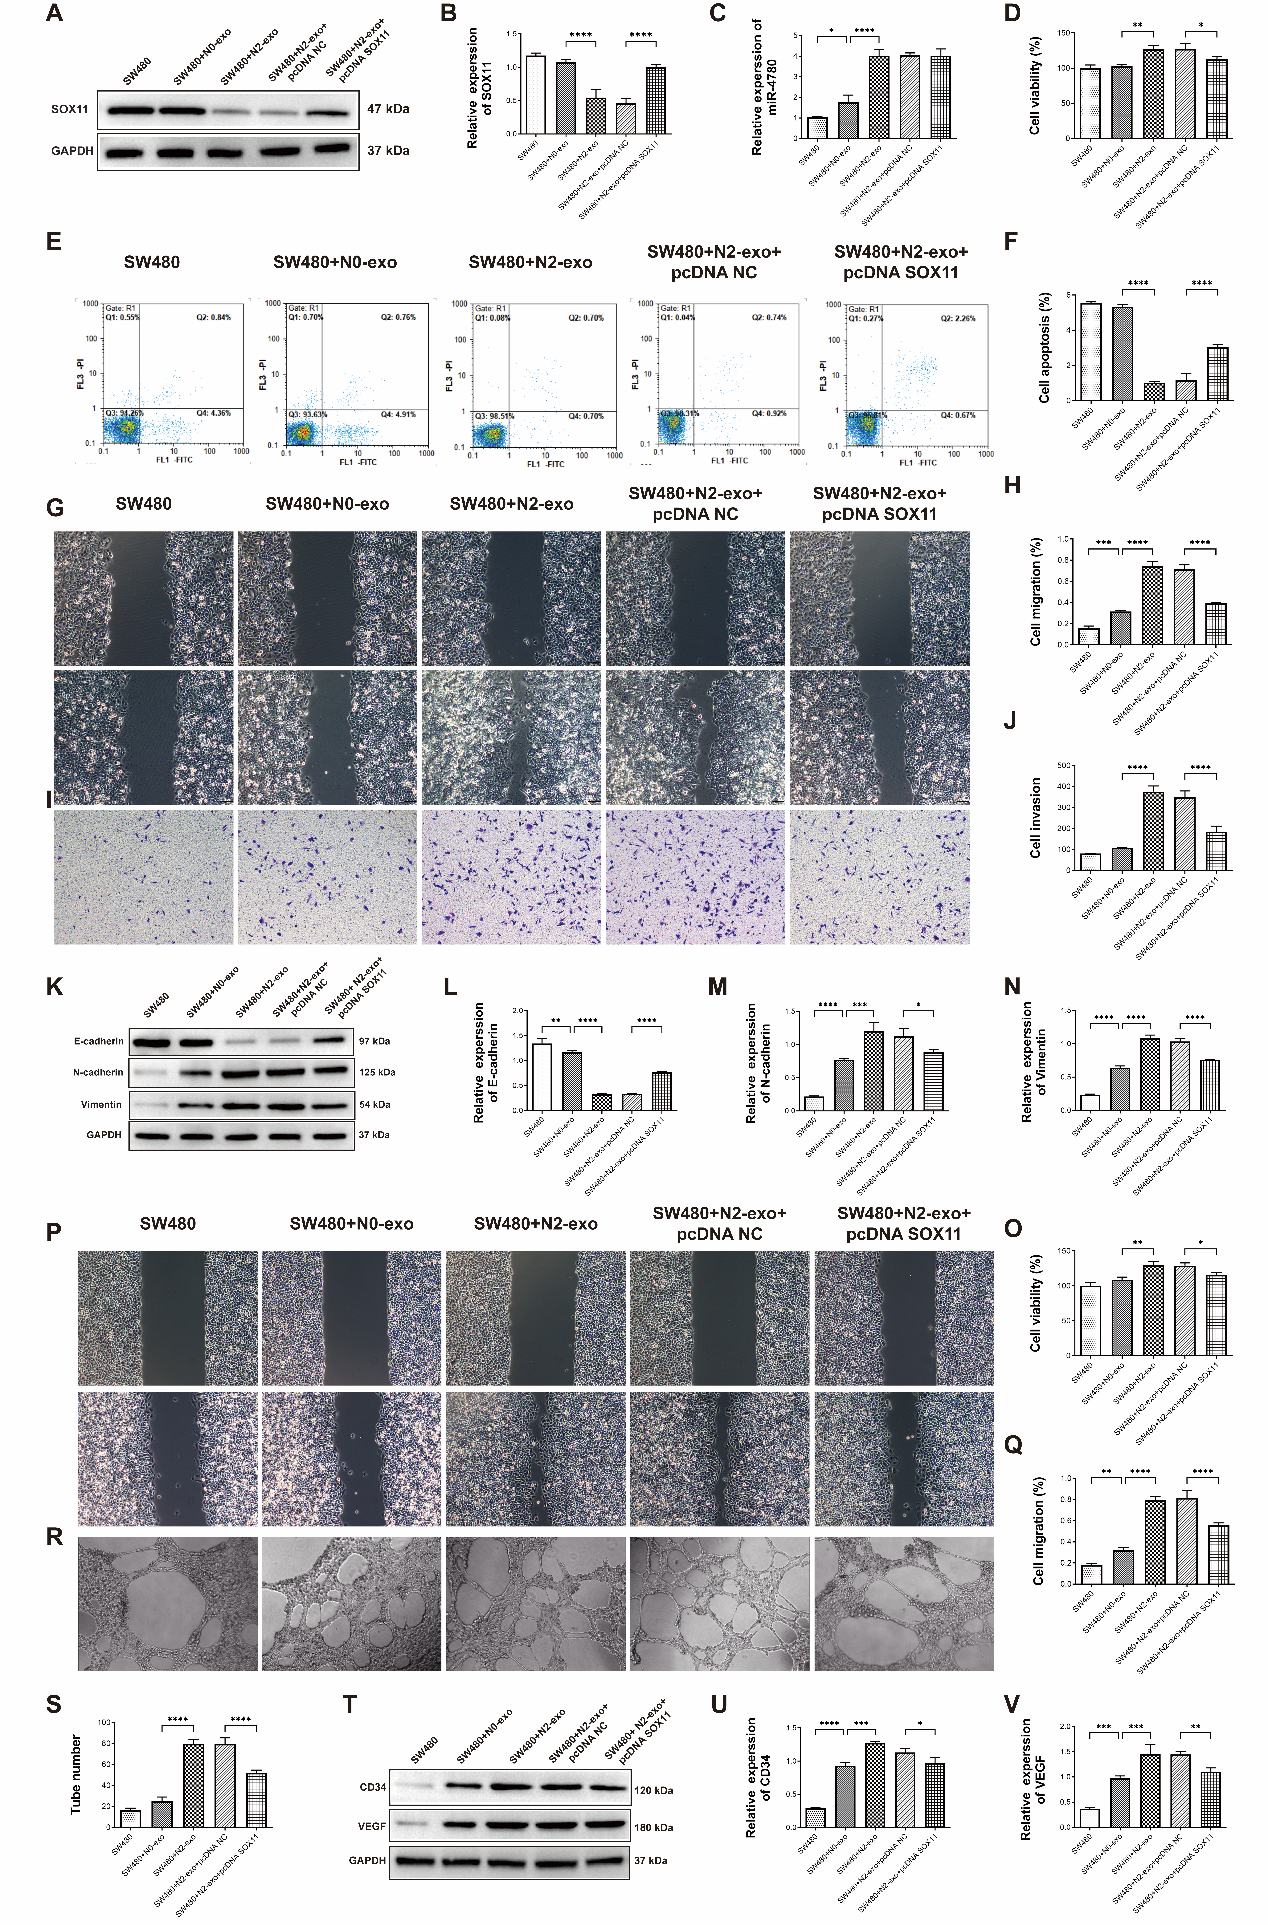
**

**Supplement figure 5: SOX11 was a target of miR-4780 and aggravated EMT and angiogenesis of SW480.** (A-B) Protein expression of SOX11. (C) Expression of miR-4780. (D) CCK8 assay for cellular viability. (E-F) Cell apoptosis was detected by flow cytometer. (G-H) Wound healing assay for cell migration (*10) (I-J) Transwell assay for cell invasion (*10). (K-N) The expression of EMT associated proteins, E-cadherin, N- cadherin and Vimentin in COLO205 were measured via western blot. (O) CCK8 assay for cellular viability of HUVECs. (P-Q) Wound healing assay for cell migration of HUVECs. (*10) (R-S) Tube formation assay (*40) (T-V) The expression of angiogenesis associated proteins, CD34 and VEGF in HUVECs were measured via western blot. Error bars represent SD. *, *p* < 0.05; **, *p* < 0.01; ***, *p* < 0.001; ****, *p* < 0.0001.
